# Supplementary material for: Effects of test experience, closed-arm wall color, and illumination level on behavior and plasma corticosterone response in an elevated plus maze in male C57BL/6J mice: a challenge against conventional interpretation of the test
Source: Springer Nature journal article supplement (doi:10.1186/s13041-020-00721-2), 2021-02-15

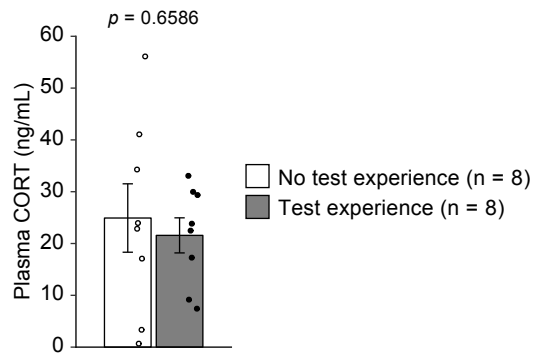

Supplement: MOESM3 [file 25664186]
